# Supplementary material
Source: publisher figshare collection journal article supplement (https://frontiersin.figshare.com/ndownloader/files/12842156)
Supplement: Supplementary file [file 12842156]

## *Supplementary Material*

# **Iohexol degradation by biogenic palladium nanoparticles hosted in anaerobic granular sludge**

Xiangchun Quan\*, Xin Zhang, Yue Sun, Jinbo Zhao

Key Laboratory of Water and Sediment Sciences of Ministry of Education, State Key Laboratory of Water Environment Simulation, School of Environment, Beijing Normal University, Beijing 100875, China

**\* Correspondence:**

Corresponding Author

E-mail: xchquan@bnu.edu.cn

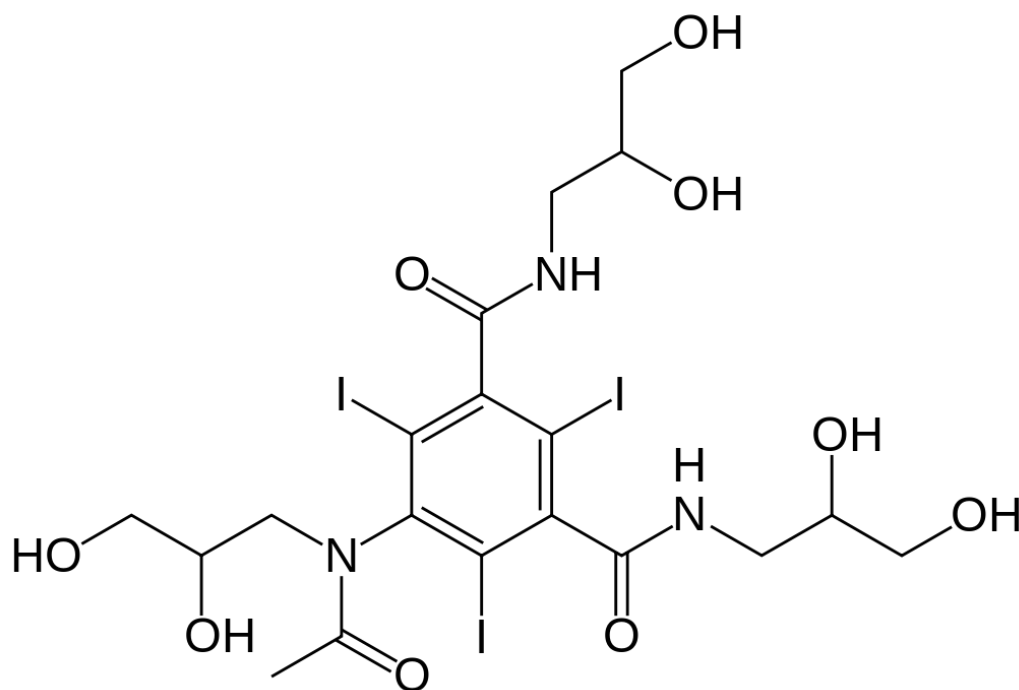

**Figure S1.** Chemical structure of iohexol

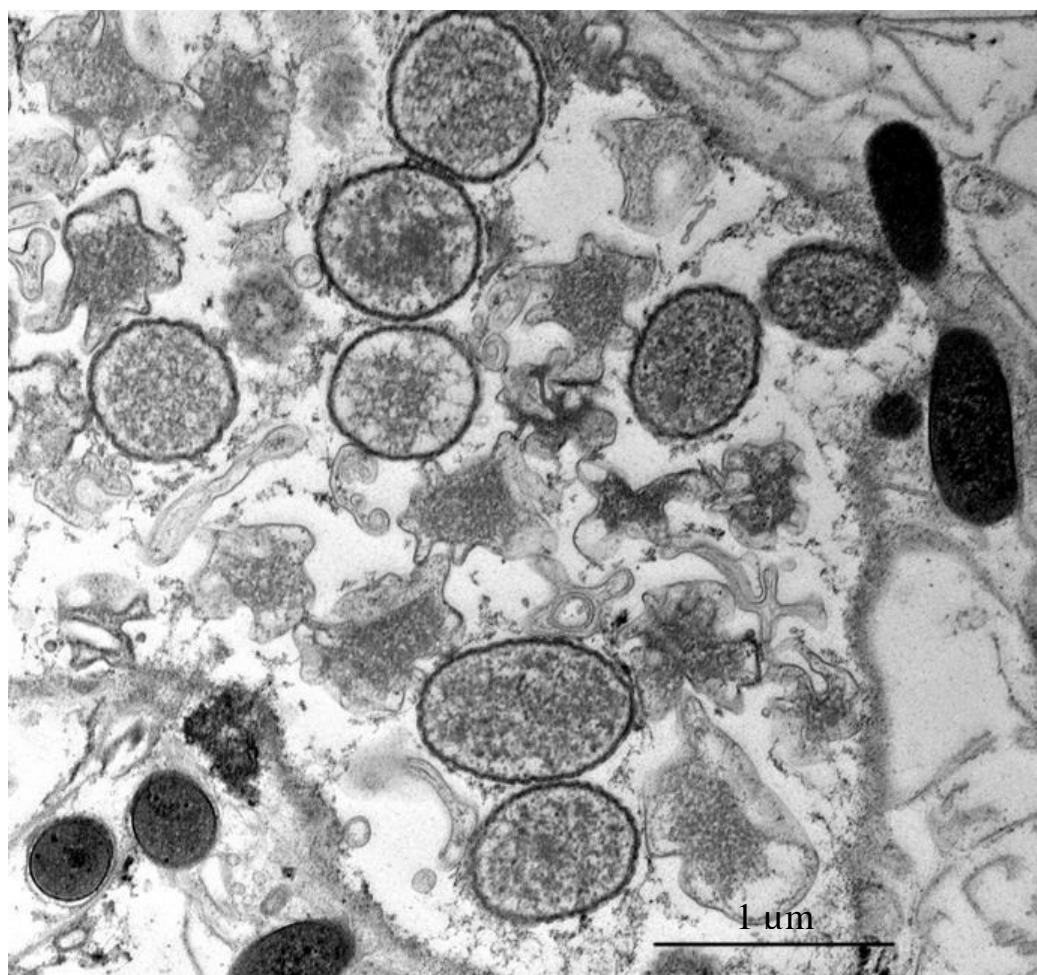

**Figure S2 TEM images showing the presence of PdNPs in the microbes of AGS**
